# Supplementary material for: Epithelioid neoplasm of the spinal cord in a child with spinal muscular atrophy treated with onasemnogene abeparvovec
Source: PubMed Central journal article supplement (PMC10556221; doi:10.1016/j.ymthe.2023.08.013), 2023-08-19
Supplement: mmc1.pdf [file mmc1.pdf]

**YMTHE, Volume 31**

**Supplemental Information**

**Epithelioid neoplasm of the spinal cord  
in a child with spinal muscular atrophy treated  
with onasemnogene abeparvovec**

**Laura Retson, Nishant Tiwari, Jennifer Vaughn, Saunder Bernes, P. David Adelson, Keith Mansfield, Silvana Libertini, Brent Kuzmiski, Iulian Alecu, Richard Gabriel, and Ross Mangum**

SUPPLEMENTAL MATERIAL

SUPPLEMENTAL FIGURES

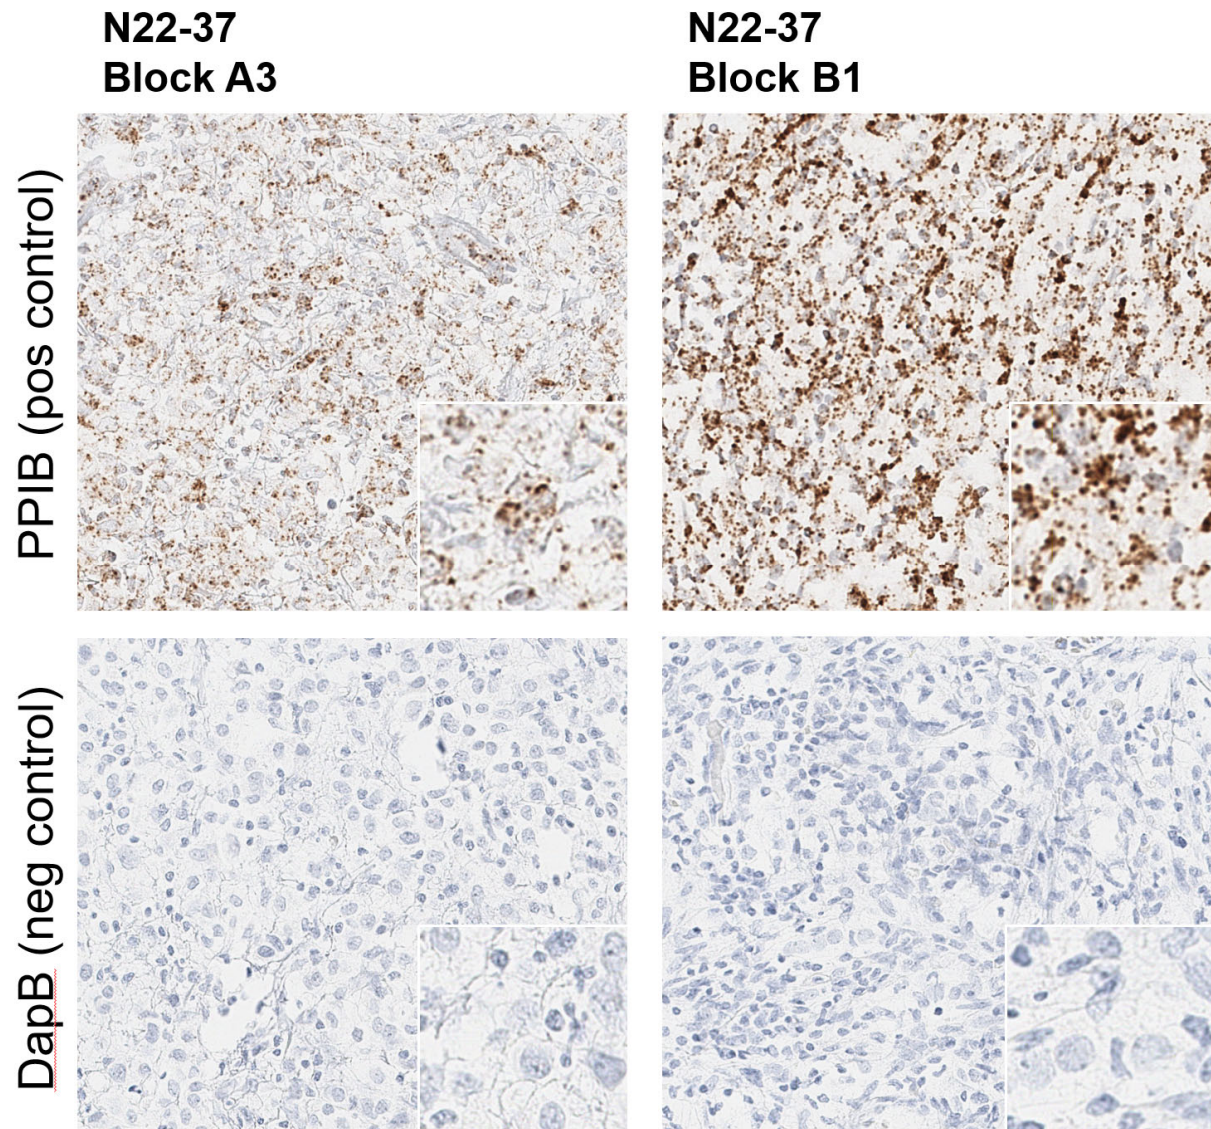

Figure S1. *In situ* hybridization for tissue positive (PPIB) and negative (DapB) controls.
